# Supplementary material for: Identifying the quality markers and optimizing the processing of Gastrodiae rhizoma to treat brain diseases
Source: PubMed Central journal article supplement (PMC11576197; doi:10.3389/fphar.2024.1396825), 2024-11-06
Supplement: Table1.pdf [file Table1.pdf]

## Supplement Tables

**Table S1. UPLC-QTOF-MS/MS Characterization of Chemical Constituents in different processing pieces of *Gastrodia elata* Blume**

| No. | t <sub>R</sub> /min | Identification                        | formula                                                             | [M-H] <sup>-</sup> (m/z) | ppm   | Fragmentation ions                                                        | Ref      | class |
|-----|---------------------|---------------------------------------|---------------------------------------------------------------------|--------------------------|-------|---------------------------------------------------------------------------|----------|-------|
| 1   | 1.72                | Galactinol                            | C <sub>12</sub> H <sub>22</sub> O <sub>11</sub>                     | 341.1091                 | 2.05  | 179.0611 101.0259 89.0267                                                 | Massbank | AC    |
| 2   | 2.14                | Citric acid                           | C <sub>6</sub> H <sub>8</sub> O <sub>7</sub>                        | 191.0181                 | -5.76 | 173.0143 129.0218 111.0117                                                | 1        | OA    |
| 3   | 3.18                | Isomer of Citric acid                 | C <sub>6</sub> H <sub>8</sub> O <sub>7</sub>                        | 191.0219                 | -6.28 | 111.0117 87.0079 85.0293                                                  | 2        | OA    |
| 4   | 8.69                | Gastrodin                             | C <sub>13</sub> H <sub>18</sub> O <sub>7</sub>                      | 331.1030                 | 0.30  | 285.1281 161.0605 123.0572                                                | Std      | AC    |
| 5   | 8.98                | 3-Phenylpropanoic acid                | C <sub>9</sub> H <sub>11</sub> NO <sub>2</sub>                      | 164.0708                 | -2.44 | 101.0301 89.0229 85.0331 71.0185 59.0146                                  | Massbank | AC    |
| 6   | 9.48                | p-hydroxybenzyl alcohol               | C <sub>7</sub> H <sub>8</sub> O <sub>2</sub>                        | 123.0436                 | -8.13 | 106.9507 88.9437 77.0491                                                  | Std      | AC    |
| 7   | 10.21               | Glucosyringic acid                    | C <sub>15</sub> H <sub>20</sub> O <sub>10</sub>                     | 359.0967                 | -3.06 | 341.1210 197.0625 123.0141 95.0163                                        | 3        | AC    |
| 8   | 10.56               | Uracil                                | C <sub>4</sub> H <sub>4</sub> N <sub>2</sub> O <sub>2</sub>         | 111.0181                 | 7.21  | 101.0239 89.0287 82.6839 78.9586 71.0150                                  | Massbank | NC    |
| 9   | 11.42               | Parishin E                            | C <sub>19</sub> H <sub>24</sub> O <sub>13</sub>                     | 459.1152                 | 2.83  | 459.1531 129.0288 111.0181                                                | Std      | AC    |
| 10  | 11.85               | s-( 4-hydroxybenzyl) -<br>glutathione | C <sub>17</sub> H <sub>23</sub> N <sub>3</sub> O <sub>7</sub> S     | 412.1164                 | -3.40 | 306.0810 210.0961 160.0099 143.0518 128.0376 99.0539                      | 2        | SC    |
| 11  | 12.00               | S-(Gastrodin)-glutathione             | C <sub>23</sub> H <sub>33</sub> O <sub>12</sub> N <sub>3</sub><br>S | 574.1713                 | 1.04  | 574.1931 306.0845 272.0944 210.0842 179.0502 143.0493<br>128.0353 99.0579 | 4        | SC    |
| 12  | 12.40               | CA(Glu/p-HA-O-Met/0)                  | C <sub>20</sub> H <sub>26</sub> O <sub>14</sub>                     | 489.1245                 | 0.20  | 266.7658 173.0046 111.0082                                                | 5        | OA    |
| 13  | 14.08               | p-hydroxybenz aldehyde                | C <sub>7</sub> H <sub>6</sub> O <sub>2</sub>                        | 121.0279                 | -9.09 | 121.0373                                                                  | Std      | AC    |
| 14  | 15.09               | Adenisine                             | C <sub>10</sub> H <sub>13</sub> N <sub>5</sub> O <sub>4</sub>       | 266.0897                 | 3.01  | 134.0491 107.0355 92.0266                                                 | 2        | NC    |

|    |       |                                   |                                                               |           |        |                                                                                     |          |    |
|----|-------|-----------------------------------|---------------------------------------------------------------|-----------|--------|-------------------------------------------------------------------------------------|----------|----|
| 15 | 15.70 | Parishin B                        | C <sub>32</sub> H <sub>40</sub> O <sub>19</sub>               | 727.2069  | -2.34  | 727.2749 423.1193 369.1395 217.0708 161.0580 111.0160                               | Std      | AC |
| 16 | 15.92 | Parishin V                        | C <sub>38</sub> H <sub>50</sub> O <sub>24</sub>               | 889.2626  | 1.35   | 727.2583 423.1235 397.1448 323.1226 161.0554 111.0181                               | 3        | AC |
| 17 | 16.25 | Parishin H                        | C <sub>33</sub> H <sub>42</sub> O <sub>20</sub>               | 757.2133  | -7.66  | 485.0511 459.1487 385.1067 336.5907 256.0884 190.9654<br>183.8740 175.0481 111.0160 | 3        | AC |
| 18 | 16.54 | Parishin C                        | C <sub>32</sub> H <sub>40</sub> O <sub>19</sub>               | 727.2069  | -2.34  | 727.2749 441.1478 423.1361 397.1366 217.0678 161.0580                               | Std      | AC |
| 19 | 17.10 | Parishin M                        | C <sub>33</sub> H <sub>42</sub> O <sub>20</sub>               | 757.2242  | 6.74   | 626.0646 161.0554 111.0138                                                          | 3        | AC |
| 20 | 17.52 | Parishin K                        | C <sub>33</sub> H <sub>42</sub> O <sub>19</sub>               | 741.2269  | 3.64   | 473.1661 169.0247 123.0550 83.0193                                                  | 3        | AC |
| 21 | 17.70 | Parishin F                        | C <sub>51</sub> H <sub>66</sub> O <sub>30</sub>               | 1157.3412 | -12.87 | 889.3603 757.2749 585.2158 423.1361 161.0501 112.9943                               | 3        | AC |
| 22 | 18.60 | 4,4'-Dihydroxybenzyl sulfoxide    | C <sub>14</sub> H <sub>14</sub> SO <sub>3</sub>               | 261.0565  | -7.66  | 111.0117 81.7649                                                                    | 3, 6     | SC |
| 23 | 18.88 | Parishin A                        | C <sub>45</sub> H <sub>56</sub> O <sub>25</sub>               | 995.3074  | 4.22   | 995.4046 727.2804 441.1435 423.1361 397.1570 217.0678<br>161.0580 111.0160          | Std      | AC |
| 24 | 19.20 | Parishin L                        | C <sub>46</sub> H <sub>58</sub> O <sub>26</sub>               | 1025.3212 | 7.22   | 727.2252 423.1066 161.0528 111.0095                                                 | 4        | AC |
| 25 | 19.71 | Parishin W                        | C <sub>26</sub> H <sub>30</sub> O <sub>14</sub>               | 565.1519  | -6.72  | 305.0824 111.0117                                                                   | 3        | AC |
| 26 | 20.12 | Gastrodioside                     | C <sub>20</sub> H <sub>24</sub> O <sub>8</sub>                | 391.1350  | -10.99 | 22.0911 161.0424 123.0504 121.0328 93.0370                                          | 3,6      | AC |
| 27 | 21.20 | Azelaic acid                      | C <sub>9</sub> H <sub>16</sub> O <sub>4</sub>                 | 187.0973  | 1.60   | 187.1003 125.0984 116.9348                                                          | Massbank | OA |
| 28 | 21.52 | Parishin R                        | C <sub>52</sub> H <sub>62</sub> O <sub>26</sub>               | 1101.3513 | 5.63   | 727.1869 346.1662 161.0400                                                          | 5        | AC |
| 29 | 23.51 | CA(CA/0/p-HA-Rha/0)/p-HA-p-HPP/0) | C <sub>41</sub> H <sub>46</sub> O <sub>20</sub>               | 857.2548  | 5.13   | 423.1031 362.0992 111.0091                                                          | 5        | OA |
| 30 | 23.98 | 4,4'-dihydroxydibenzyl ether      | C <sub>14</sub> H <sub>14</sub> O <sub>3</sub>                | 229.0873  | 3.49   | 121.0306 107.0524 93.0370                                                           | 2        | AC |
| 31 | 24.08 | Parishin D                        | C <sub>20</sub> H <sub>20</sub> O <sub>9</sub>                | 403.1042  | 3.22   | 191.0276 111.0095 87.0118                                                           | 6        | AC |
| 32 | 26.36 | Grossamide                        | C <sub>36</sub> H <sub>36</sub> N <sub>2</sub> O <sub>8</sub> | 623.2384  | -1.44  | 460.2022 297.1312                                                                   | 3        | NC |

**AC: aromatic compounds; NC: nitrogen compounds; SC: sulfur compounds; QA: organic acids**

#### References:

- [1] Lai, C. J., Yuan, Y., Liu, D. H., Kang, C. Z., Zhang, Y., Zha, L., Kang, L., Chen, T., Nan, T. G., Hao, Q. X., and Huang, L. Q. (2017). Untargeted metabolite analysis-based UHPLC-Q-TOF-MS reveals significant enrichment of p-hydroxybenzyl dimers of citric acids in fresh beige-scape *Gastrodia elata* (Wutianma). *J. Pharm. Biomed. Anal.* 140, 287-294. doi: 10.1016/j.jpba.2017.03.055
- [2] Yun, L., Zhi, W. W., Yan, L. G., Hong, L. Z., Da, H. L., and Xiao, W. (2016). Study on the determination of chemical constituents in *Rhizoma gastrodiae* and *Rhizoma erythrorhiza* by HPLC-ESI-TOF/MS. *J. Research and development of natural products.* 28(11), 1758-1763.
- [3] Li, Z., Wang, Y., Ouyang, H., Lu, Y., Qiu, Y., Feng, Y., Jiang, H., Zhou, X., and Yang, S. (2015). A novel dereplication strategy for the identification of two new trace compounds in the extract of *Gastrodia elata* using UHPLC/Q-TOF-MS/MS. *J. Chromatogr. B.* 988, 45-52. doi: 10.1016/j.jchromb.2015.02.020
- [4] Tang, C., Wang, L., Li, J., Liu, X., Cheng, M., and Xiao, H. (2015). Analysis of the metabolic profile of parishin by ultra-performance liquid chromatography/quadrupole-time of flight mass spectrometry. *Biomed. Chromatogr.* 29(12), 1913-20. doi: 10.1002/bmc.3516
- [5] Tang, C., Wang, L., Liu, X., Cheng, M., and Xiao, H. (2016). Chemical fingerprint and metabolic profile analysis of ethyl acetate fraction of *Gastrodia elata* by ultra performance liquid chromatography/quadrupole-time of flight mass spectrometry. *J. Chromatogr. B.* 1011, 233-9. doi: 10.1016/j.jchromb.2015.09.043
- [6] Ye, X., Wang, Y., Zhao, J., Wang, M., Avula, B., Peng, Q., Ouyang, H., Lingyun, Z., Zhang, J., and Khan, I. A. (2019). Identification and Characterization of Key Chemical Constituents in Processed *Gastrodia elata* Using UHPLC-MS/MS and Chemometric Methods. *J. Anal. Methods Chem.* 2019, 4396201. doi: 10.1155/2019/439620
