# Supplementary material for: Identifying the quality markers and optimizing the processing of Gastrodiae rhizoma to treat brain diseases
Source: PubMed Central journal article supplement (PMC11576197; doi:10.3389/fphar.2024.1396825), 2024-11-06
Supplement: Table2.pdf [file Table2.pdf]

## Supplement Tables

**Table S2. Normality and Lognormality Tests and P value of figure 3**

| Marker                    | Groups                    | P value | Passed normality test (alpha=0.05) | Choice of analytical method          |
|---------------------------|---------------------------|---------|------------------------------------|--------------------------------------|
| <i>Galactinol</i>         | No steam-Sun drying       | 0.5520  | Yes                                | One-Way ANOVA Tukey's post hoc tests |
|                           | No steam-Hot air drying   | 0.9374  | Yes                                |                                      |
|                           | No steam-Freeze drying    | 0.1322  | Yes                                |                                      |
|                           | No steam-Microwave drying | 0.9181  | Yes                                |                                      |
|                           | Steam-Sun drying          | 0.3916  | Yes                                |                                      |
|                           | Steam-Hot air drying      | 0.0567  | Yes                                |                                      |
|                           | Steam-Freeze drying       | 0.6993  | Yes                                |                                      |
|                           | Steam-Microwave drying    | 0.9245  | Yes                                |                                      |
| <i>Citric acid</i>        | No steam-Sun drying       | 0.4763  | Yes                                | One-Way ANOVA Tukey's post hoc tests |
|                           | No steam-Hot air drying   | 0.7500  | Yes                                |                                      |
|                           | No steam-Freeze drying    | 0.5658  | Yes                                |                                      |
|                           | No steam-Microwave drying | 0.3477  | Yes                                |                                      |
|                           | Steam-Sun drying          | 0.8859  | Yes                                |                                      |
|                           | Steam-Hot air drying      | 0.9343  | Yes                                |                                      |
|                           | Steam-Freeze drying       | 0.1224  | Yes                                |                                      |
|                           | Steam-Microwave drying    | 0.8693  | Yes                                |                                      |
| <i>Gastrodin</i>          | No steam-Sun drying       | 0.7500  | Yes                                | One-Way ANOVA Tukey's post hoc tests |
|                           | No steam-Hot air drying   | 0.7500  | Yes                                |                                      |
|                           | No steam-Freeze drying    | 0.8248  | Yes                                |                                      |
|                           | No steam-Microwave drying | 0.3972  | Yes                                |                                      |
|                           | Steam-Sun drying          | 0.0560  | Yes                                |                                      |
|                           | Steam-Hot air drying      | 0.2426  | Yes                                |                                      |
|                           | Steam-Freeze drying       | 0.1199  | Yes                                |                                      |
|                           | Steam-Microwave drying    | 0.6701  | Yes                                |                                      |
| <i>Glucosyringic acid</i> | No steam-Sun drying       | 0.1985  | Yes                                | One-Way ANOVA Tukey's post hoc tests |
|                           | No steam-Hot air drying   | 0.7500  | Yes                                |                                      |
|                           | No steam-Freeze drying    | 0.2536  | Yes                                |                                      |
|                           | No steam-Microwave drying | 0.0556  | Yes                                |                                      |
|                           | Steam-Sun drying          | 0.3487  | Yes                                |                                      |
|                           | Steam-Hot air drying      | 0.6524  | Yes                                |                                      |
|                           | Steam-Freeze drying       | 0.6916  | Yes                                |                                      |
|                           | Steam-Microwave drying    | 0.4663  | Yes                                |                                      |
| <i>Uracil</i>             | No steam-Sun drying       | 0.0717  | Yes                                | One-Way ANOVA Tukey's post hoc tests |
|                           | No steam-Hot air drying   | 0.7500  | Yes                                |                                      |
|                           | No steam-Freeze drying    | 0.2055  | Yes                                |                                      |
|                           | No steam-Microwave drying | 0.7503  | Yes                                |                                      |
|                           | Steam-Sun drying          | 0.0578  | Yes                                |                                      |
|                           | Steam-Hot air drying      | 0.8412  | Yes                                |                                      |
|                           | Steam-Freeze drying       | 0.0563  | Yes                                |                                      |
|                           | Steam-Microwave drying    | 0.5160  | Yes                                |                                      |
| <i>Parishin E</i>         | No steam-Sun drying       | 0.6523  | Yes                                | One-Way ANOVA Tukey's post hoc tests |
|                           | No steam-Hot air drying   | 0.6523  | Yes                                |                                      |

|                                        |                           |        |     |                                      |
|----------------------------------------|---------------------------|--------|-----|--------------------------------------|
|                                        | No steam-Freeze drying    | 0.7500 | Yes |                                      |
|                                        | No steam-Microwave drying | 0.0599 | Yes |                                      |
|                                        | Steam-Sun drying          | 0.7187 | Yes |                                      |
|                                        | Steam-Hot air drying      | 0.8131 | Yes |                                      |
|                                        | Steam-Freeze drying       | 0.6933 | Yes |                                      |
|                                        | Steam-Microwave drying    | 0.8895 | Yes |                                      |
| <i>S-(4-hydroxybenzyl)-glutathione</i> | No steam-Sun drying       | 0.8266 | Yes | One-Way ANOVA Tukey's post hoc tests |
|                                        | No steam-Hot air drying   | 0.7500 | Yes |                                      |
|                                        | No steam-Freeze drying    | 0.0529 | Yes |                                      |
|                                        | No steam-Microwave drying | 0.4719 | Yes |                                      |
|                                        | Steam-Sun drying          | 0.2366 | Yes |                                      |
|                                        | Steam-Hot air drying      | 0.9542 | Yes |                                      |
|                                        | Steam-Freeze drying       | 0.3202 | Yes |                                      |
|                                        | Steam-Microwave drying    | 0.4100 | Yes |                                      |
| <i>Parishin B</i>                      | No steam-Sun drying       | 0.4166 | Yes | One-Way ANOVA Tukey's post hoc tests |
|                                        | No steam-Hot air drying   | 0.7500 | Yes |                                      |
|                                        | No steam-Freeze drying    | 0.8696 | Yes |                                      |
|                                        | No steam-Microwave drying | 0.3327 | Yes |                                      |
|                                        | Steam-Sun drying          | 0.667  | Yes |                                      |
|                                        | Steam-Hot air drying      | 0.7354 | Yes |                                      |
|                                        | Steam-Freeze drying       | 0.1340 | Yes |                                      |
|                                        | Steam-Microwave drying    | 0.4325 | Yes |                                      |
| <i>Parishin C</i>                      | No steam-Sun drying       | 0.2088 | Yes | One-Way ANOVA Tukey's post hoc tests |
|                                        | No steam-Hot air drying   | 0.7500 | Yes |                                      |
|                                        | No steam-Freeze drying    | 0.2207 | Yes |                                      |
|                                        | No steam-Microwave drying | 0.6594 | Yes |                                      |
|                                        | Steam-Sun drying          | 0.6191 | Yes |                                      |
|                                        | Steam-Hot air drying      | 0.9551 | Yes |                                      |
|                                        | Steam-Freeze drying       | 0.2108 | Yes |                                      |
|                                        | Steam-Microwave drying    | 0.4607 | Yes |                                      |
| <i>Parishin A</i>                      | No steam-Sun drying       | 0.3608 | Yes | One-Way ANOVA Tukey's post hoc tests |
|                                        | No steam-Hot air drying   | 0.7500 | Yes |                                      |
|                                        | No steam-Freeze drying    | 0.5436 | Yes |                                      |
|                                        | No steam-Microwave drying | 0.4245 | Yes |                                      |
|                                        | Steam-Sun drying          | 0.2924 | Yes |                                      |
|                                        | Steam-Hot air drying      | 0.1413 | Yes |                                      |
|                                        | Steam-Freeze drying       | 0.525  | Yes |                                      |
|                                        | Steam-Microwave drying    | 0.0476 | Yes |                                      |
| <i>Parishin D</i>                      | No steam-Sun drying       | 0.3127 | Yes | One-Way ANOVA Tukey's post hoc tests |
|                                        | No steam-Hot air drying   | 0.7500 | Yes |                                      |
|                                        | No steam-Freeze drying    | 0.0906 | Yes |                                      |
|                                        | No steam-Microwave drying | 0.5181 | Yes |                                      |
|                                        | Steam-Sun drying          | 0.2624 | Yes |                                      |
|                                        | Steam-Hot air drying      | 0.8894 | Yes |                                      |
|                                        | Steam-Freeze drying       | 0.1245 | Yes |                                      |
|                                        | Steam-Microwave drying    | 0.5580 | Yes |                                      |
| <i>Parishin L</i>                      | No steam-Sun drying       | 0.9653 | Yes | One-Way ANOVA Tukey's post hoc tests |
|                                        | No steam-Hot air drying   | 0.7500 | Yes |                                      |

|                   |                           |        |     |                                      |
|-------------------|---------------------------|--------|-----|--------------------------------------|
|                   | No steam-Freeze drying    | 0.0659 | Yes |                                      |
|                   | No steam-Microwave drying | 0.9331 | Yes |                                      |
|                   | Steam-Sun drying          | 0.6165 | Yes |                                      |
|                   | Steam-Hot air drying      | 0.8073 | Yes |                                      |
|                   | Steam-Freeze drying       | 0.4061 | Yes |                                      |
|                   | Steam-Microwave drying    | 0.1855 | Yes |                                      |
| <i>Parishin R</i> | No steam-Sun drying       | 0.0847 | Yes | One-Way ANOVA Tukey's post hoc tests |
|                   | No steam-Hot air drying   | 0.7500 | Yes |                                      |
|                   | No steam-Freeze drying    | 0.4192 | Yes |                                      |
|                   | No steam-Microwave drying | 0.1928 | Yes |                                      |
|                   | Steam-Sun drying          | 0.8526 | Yes |                                      |
|                   | Steam-Hot air drying      | 0.0580 | Yes |                                      |
|                   | Steam-Freeze drying       | 0.5038 | Yes |                                      |
|                   | Steam-Microwave drying    | 0.7694 | Yes |                                      |
