# Supplementary material for: Identifying the quality markers and optimizing the processing of Gastrodiae rhizoma to treat brain diseases
Source: PubMed Central journal article supplement (PMC11576197; doi:10.3389/fphar.2024.1396825), 2024-11-06
Supplement: Table3.pdf [file Table3.pdf]

## Supplement Tables

**Table S3. The F value and P value in multiple comparisons of figure 3**

| Marker                                          | Groups                                                | Mean Diff. | Type of ANOVA                           | F, DFn, Dfd       | P Value |
|-------------------------------------------------|-------------------------------------------------------|------------|-----------------------------------------|-------------------|---------|
| <i>Galactinol</i>                               | No steam-Sun drying vs. No steam-Hot air drying       | -3.312     | One-Way ANOVA<br>Tukey's post hoc tests | F (7, 16) = 1.660 | 0.9818  |
|                                                 | No steam-Sun drying vs. No steam-Freeze drying        | -0.7721    |                                         |                   | >0.9999 |
|                                                 | No steam-Sun drying vs. No steam-Microwave drying     | 0.07840    |                                         |                   | >0.9999 |
|                                                 | No steam-Sun drying vs. Steam-Sun drying              | -2.571     |                                         |                   | 0.9958  |
|                                                 | No steam-Sun drying vs. Steam-Hot air drying          | 7.071      |                                         |                   | 0.5568  |
|                                                 | No steam-Sun drying vs. Steam-Freeze drying           | -3.372     |                                         |                   | 0.9799  |
|                                                 | No steam-Sun drying vs. Steam-Microwave drying        | 0.1865     |                                         |                   | >0.9999 |
|                                                 | No steam-Hot air drying vs. No steam-Freeze drying    | 2.540      |                                         |                   | 0.9961  |
|                                                 | No steam-Hot air drying vs. No steam-Microwave drying | 3.391      |                                         |                   | 0.9792  |
|                                                 | No steam-Hot air drying vs. Steam-Sun drying          | 0.7409     |                                         |                   | >0.9999 |
|                                                 | No steam-Hot air drying vs. Steam-Hot air drying      | 10.38      |                                         |                   | 0.1571  |
|                                                 | No steam-Hot air drying vs. Steam-Freeze drying       | -0.05945   |                                         |                   | >0.9999 |
|                                                 | No steam-Hot air drying vs. Steam-Microwave drying    | 3.499      |                                         |                   | 0.9754  |
|                                                 | No steam-Freeze drying vs. No steam-Microwave drying  | 0.8505     |                                         |                   | >0.9999 |
|                                                 | No steam-Freeze drying vs. Steam-Sun drying           | -1.799     |                                         |                   | 0.9996  |
|                                                 | No steam-Freeze drying vs. Steam-Hot air drying       | 7.843      |                                         |                   | 0.4370  |
|                                                 | No steam-Freeze drying vs. Steam-Freeze drying        | -2.600     |                                         |                   | 0.9955  |
|                                                 | No steam-Freeze drying vs. Steam-Microwave drying     | 0.9587     |                                         |                   | >0.9999 |
|                                                 | No steam-Microwave drying vs. Steam-Sun drying        | -2.650     |                                         |                   | 0.9950  |
|                                                 | No steam-Microwave drying vs. Steam-Hot air drying    | 6.992      |                                         |                   | 0.5694  |
|                                                 | No steam-Microwave drying vs. Steam-Freeze drying     | -3.450     |                                         |                   | 0.9772  |
|                                                 | No steam-Microwave drying vs. Steam-Microwave drying  | 0.1081     |                                         |                   | >0.9999 |
|                                                 | Steam-Sun drying vs. Steam-Hot air drying             | 9.642      |                                         |                   | 0.2180  |
|                                                 | Steam-Sun drying vs. Steam-Freeze drying              | -0.8003    |                                         |                   | >0.9999 |
|                                                 | Steam-Sun drying vs. Steam-Microwave drying           | 2.758      |                                         |                   | 0.9936  |
|                                                 | Steam-Hot air drying vs. Steam-Freeze drying          | -10.44     |                                         |                   | 0.1529  |
| Steam-Hot air drying vs. Steam-Microwave drying | -6.884                                                | 0.5868     |                                         |                   |         |
| Steam-Freeze drying vs. Steam-Microwave drying  | 3.558                                                 | 0.9731     |                                         |                   |         |
| <i>Citric acid</i>                              | No steam-Sun drying vs. No steam-Hot air drying       | -7.121     | One-Way ANOVA<br>Tukey's post hoc tests | F (7, 16) = 53.02 | 0.0003  |
|                                                 | No steam-Sun drying vs. No steam-Freeze drying        | 0.2581     |                                         |                   | >0.9999 |
|                                                 | No steam-Sun drying vs. No steam-Microwave drying     | 10.09      |                                         |                   | <0.0001 |
|                                                 | No steam-Sun drying vs. Steam-Sun drying              | 10.97      |                                         |                   | <0.0001 |
|                                                 | No steam-Sun drying vs. Steam-Hot air drying          | 1.552      |                                         |                   | 0.8742  |
|                                                 | No steam-Sun drying vs. Steam-Freeze drying           | 6.317      |                                         |                   | 0.0012  |
|                                                 | No steam-Sun drying vs. Steam-Microwave drying        | 5.952      |                                         |                   | 0.0021  |
|                                                 | No steam-Hot air drying vs. No steam-Freeze drying    | 7.379      |                                         |                   | 0.0002  |
|                                                 | No steam-Hot air drying vs. No steam-Microwave drying | 17.21      |                                         |                   | <0.0001 |
|                                                 | No steam-Hot air drying vs. Steam-Sun drying          | 18.09      |                                         |                   | <0.0001 |
|                                                 | No steam-Hot air drying vs. Steam-Hot air drying      | 8.673      |                                         |                   | <0.0001 |
|                                                 | No steam-Hot air drying vs. Steam-Freeze drying       | 13.44      |                                         |                   | <0.0001 |
|                                                 | No steam-Hot air drying vs. Steam-Microwave drying    | 13.07      |                                         |                   | <0.0001 |

|                                                   |                                                       |                                                 |                                         |                   |         |                                         |                   |         |
|---------------------------------------------------|-------------------------------------------------------|-------------------------------------------------|-----------------------------------------|-------------------|---------|-----------------------------------------|-------------------|---------|
|                                                   | No steam-Freeze drying vs. No steam-Microwave drying  | 9.832                                           |                                         |                   | <0.0001 |                                         |                   |         |
|                                                   | No steam-Freeze drying vs. Steam-Sun drying           | 10.71                                           |                                         |                   | <0.0001 |                                         |                   |         |
|                                                   | No steam-Freeze drying vs. Steam-Hot air drying       | 1.294                                           |                                         |                   | 0.9454  |                                         |                   |         |
|                                                   | No steam-Freeze drying vs. Steam-Freeze drying        | 6.059                                           |                                         |                   | 0.0018  |                                         |                   |         |
|                                                   | No steam-Freeze drying vs. Steam-Microwave drying     | 5.694                                           |                                         |                   | 0.0032  |                                         |                   |         |
|                                                   | No steam-Microwave drying vs. Steam-Sun drying        | 0.8789                                          |                                         |                   | 0.9934  |                                         |                   |         |
|                                                   | No steam-Microwave drying vs. Steam-Hot air drying    | -8.538                                          |                                         |                   | <0.0001 |                                         |                   |         |
|                                                   | No steam-Microwave drying vs. Steam-Freeze drying     | -3.773                                          |                                         |                   | 0.0762  |                                         |                   |         |
|                                                   | No steam-Microwave drying vs. Steam-Microwave drying  | -4.138                                          |                                         |                   | 0.0426  |                                         |                   |         |
|                                                   | Steam-Sun drying vs. Steam-Hot air drying             | -9.417                                          |                                         |                   | <0.0001 |                                         |                   |         |
|                                                   | Steam-Sun drying vs. Steam-Freeze drying              | -4.651                                          |                                         |                   | 0.0183  |                                         |                   |         |
|                                                   | Steam-Sun drying vs. Steam-Microwave drying           | -5.017                                          |                                         |                   | 0.0100  |                                         |                   |         |
|                                                   | Steam-Hot air drying vs. Steam-Freeze drying          | 4.765                                           |                                         |                   | 0.0152  |                                         |                   |         |
|                                                   | Steam-Hot air drying vs. Steam-Microwave drying       | 4.400                                           |                                         |                   | 0.0278  |                                         |                   |         |
|                                                   | Steam-Freeze drying vs. Steam-Microwave drying        | -0.3652                                         |                                         |                   | >0.9999 |                                         |                   |         |
| <i>Gastrodin</i>                                  | No steam-Sun drying vs. No steam-Hot air drying       | -0.09135                                        | One-Way ANOVA<br>Tukey's post hoc tests | F (7, 16) = 196.4 | >0.9999 |                                         |                   |         |
|                                                   | No steam-Sun drying vs. No steam-Freeze drying        | -0.1319                                         |                                         |                   | >0.9999 |                                         |                   |         |
|                                                   | No steam-Sun drying vs. No steam-Microwave drying     | -7.405                                          |                                         |                   | <0.0001 |                                         |                   |         |
|                                                   | No steam-Sun drying vs. Steam-Sun drying              | -5.135                                          |                                         |                   | <0.0001 |                                         |                   |         |
|                                                   | No steam-Sun drying vs. Steam-Hot air drying          | -4.068                                          |                                         |                   | <0.0001 |                                         |                   |         |
|                                                   | No steam-Sun drying vs. Steam-Freeze drying           | -6.772                                          |                                         |                   | <0.0001 |                                         |                   |         |
|                                                   | No steam-Sun drying vs. Steam-Microwave drying        | -8.908                                          |                                         |                   | <0.0001 |                                         |                   |         |
|                                                   | No steam-Hot air drying vs. No steam-Freeze drying    | -0.04050                                        |                                         |                   | >0.9999 |                                         |                   |         |
|                                                   | No steam-Hot air drying vs. No steam-Microwave drying | -7.313                                          |                                         |                   | <0.0001 |                                         |                   |         |
|                                                   | No steam-Hot air drying vs. Steam-Sun drying          | -5.044                                          |                                         |                   | <0.0001 |                                         |                   |         |
|                                                   | No steam-Hot air drying vs. Steam-Hot air drying      | -3.976                                          |                                         |                   | <0.0001 |                                         |                   |         |
|                                                   | No steam-Hot air drying vs. Steam-Freeze drying       | -6.680                                          |                                         |                   | <0.0001 |                                         |                   |         |
|                                                   | No steam-Hot air drying vs. Steam-Microwave drying    | -8.817                                          |                                         |                   | <0.0001 |                                         |                   |         |
|                                                   | No steam-Freeze drying vs. No steam-Microwave drying  | -7.273                                          |                                         |                   | <0.0001 |                                         |                   |         |
|                                                   | No steam-Freeze drying vs. Steam-Sun drying           | -5.004                                          |                                         |                   | <0.0001 |                                         |                   |         |
|                                                   | No steam-Freeze drying vs. Steam-Hot air drying       | -3.936                                          |                                         |                   | <0.0001 |                                         |                   |         |
|                                                   | No steam-Freeze drying vs. Steam-Freeze drying        | -6.640                                          |                                         |                   | <0.0001 |                                         |                   |         |
|                                                   | No steam-Freeze drying vs. Steam-Microwave drying     | -8.776                                          |                                         |                   | <0.0001 |                                         |                   |         |
|                                                   | No steam-Microwave drying vs. Steam-Sun drying        | 2.269                                           |                                         |                   | 0.0002  |                                         |                   |         |
|                                                   | No steam-Microwave drying vs. Steam-Hot air drying    | 3.337                                           |                                         |                   | <0.0001 |                                         |                   |         |
|                                                   | No steam-Microwave drying vs. Steam-Freeze drying     | 0.6329                                          |                                         |                   | 0.6637  |                                         |                   |         |
|                                                   | No steam-Microwave drying vs. Steam-Microwave drying  | -1.504                                          |                                         |                   | 0.0137  |                                         |                   |         |
|                                                   | Steam-Sun drying vs. Steam-Hot air drying             | 1.068                                           |                                         |                   | 0.1292  |                                         |                   |         |
|                                                   | Steam-Sun drying vs. Steam-Freeze drying              | -1.636                                          |                                         |                   | 0.0067  |                                         |                   |         |
|                                                   | Steam-Sun drying vs. Steam-Microwave drying           | -3.773                                          |                                         |                   | <0.0001 |                                         |                   |         |
|                                                   | Steam-Hot air drying vs. Steam-Freeze drying          | -2.704                                          |                                         |                   | <0.0001 |                                         |                   |         |
|                                                   | Steam-Hot air drying vs. Steam-Microwave drying       | -4.840                                          |                                         |                   | <0.0001 |                                         |                   |         |
|                                                   | Steam-Freeze drying vs. Steam-Microwave drying        | -2.136                                          |                                         |                   | 0.0005  |                                         |                   |         |
|                                                   | <i>Glucosyringic acid</i>                             | No steam-Sun drying vs. No steam-Hot air drying |                                         |                   | 8.843   | One-Way ANOVA<br>Tukey's post hoc tests | F (7, 16) = 255.3 | <0.0001 |
|                                                   |                                                       | No steam-Sun drying vs. No steam-Freeze drying  |                                         |                   | 2.219   |                                         |                   | 0.1104  |
| No steam-Sun drying vs. No steam-Microwave drying |                                                       | 19.42                                           | <0.0001                                 |                   |         |                                         |                   |         |
| No steam-Sun drying vs. Steam-Sun drying          |                                                       | 19.32                                           | <0.0001                                 |                   |         |                                         |                   |         |
| No steam-Sun drying vs. Steam-Hot air drying      |                                                       | 20.60                                           | <0.0001                                 |                   |         |                                         |                   |         |

|               |                                                       |          |                                         |                   |         |
|---------------|-------------------------------------------------------|----------|-----------------------------------------|-------------------|---------|
|               | No steam-Sun drying vs. Steam-Freeze drying           | 17.97    |                                         |                   | <0.0001 |
|               | No steam-Sun drying vs. Steam-Microwave drying        | 16.78    |                                         |                   | <0.0001 |
|               | No steam-Hot air drying vs. No steam-Freeze drying    | -6.624   |                                         |                   | <0.0001 |
|               | No steam-Hot air drying vs. No steam-Microwave drying | 10.57    |                                         |                   | <0.0001 |
|               | No steam-Hot air drying vs. Steam-Sun drying          | 10.48    |                                         |                   | <0.0001 |
|               | No steam-Hot air drying vs. Steam-Hot air drying      | 11.76    |                                         |                   | <0.0001 |
|               | No steam-Hot air drying vs. Steam-Freeze drying       | 9.123    |                                         |                   | <0.0001 |
|               | No steam-Hot air drying vs. Steam-Microwave drying    | 7.939    |                                         |                   | <0.0001 |
|               | No steam-Freeze drying vs. No steam-Microwave drying  | 17.20    |                                         |                   | <0.0001 |
|               | No steam-Freeze drying vs. Steam-Sun drying           | 17.10    |                                         |                   | <0.0001 |
|               | No steam-Freeze drying vs. Steam-Hot air drying       | 18.38    |                                         |                   | <0.0001 |
|               | No steam-Freeze drying vs. Steam-Freeze drying        | 15.75    |                                         |                   | <0.0001 |
|               | No steam-Freeze drying vs. Steam-Microwave drying     | 14.56    |                                         |                   | <0.0001 |
|               | No steam-Microwave drying vs. Steam-Sun drying        | -0.09448 |                                         |                   | >0.9999 |
|               | No steam-Microwave drying vs. Steam-Hot air drying    | 1.183    |                                         |                   | 0.7362  |
|               | No steam-Microwave drying vs. Steam-Freeze drying     | -1.451   |                                         |                   | 0.5229  |
|               | No steam-Microwave drying vs. Steam-Microwave drying  | -2.634   |                                         |                   | 0.0391  |
|               | Steam-Sun drying vs. Steam-Hot air drying             | 1.278    |                                         |                   | 0.6623  |
|               | Steam-Sun drying vs. Steam-Freeze drying              | -1.356   |                                         |                   | 0.5990  |
|               | Steam-Sun drying vs. Steam-Microwave drying           | -2.540   |                                         |                   | 0.0498  |
|               | Steam-Hot air drying vs. Steam-Freeze drying          | -2.634   |                                         |                   | 0.0391  |
|               | Steam-Hot air drying vs. Steam-Microwave drying       | -3.817   |                                         |                   | 0.0017  |
|               | Steam-Freeze drying vs. Steam-Microwave drying        | -1.183   |                                         |                   | 0.7363  |
|               | No steam-Sun drying vs. No steam-Hot air drying       | 0.08057  |                                         |                   | >0.9999 |
|               | No steam-Sun drying vs. No steam-Freeze drying        | -1.599   |                                         |                   | 0.6298  |
|               | No steam-Sun drying vs. No steam-Microwave drying     | -3.504   |                                         |                   | 0.0200  |
|               | No steam-Sun drying vs. Steam-Sun drying              | -3.122   |                                         |                   | 0.0456  |
|               | No steam-Sun drying vs. Steam-Hot air drying          | -2.323   |                                         |                   | 0.2204  |
|               | No steam-Sun drying vs. Steam-Freeze drying           | -2.014   |                                         |                   | 0.3669  |
|               | No steam-Sun drying vs. Steam-Microwave drying        | -1.971   |                                         |                   | 0.3915  |
|               | No steam-Hot air drying vs. No steam-Freeze drying    | -1.679   |                                         |                   | 0.5759  |
|               | No steam-Hot air drying vs. No steam-Microwave drying | -3.585   |                                         |                   | 0.0168  |
|               | No steam-Hot air drying vs. Steam-Sun drying          | -3.202   |                                         |                   | 0.0384  |
|               | No steam-Hot air drying vs. Steam-Hot air drying      | -2.404   |                                         |                   | 0.1907  |
|               | No steam-Hot air drying vs. Steam-Freeze drying       | -2.095   |                                         |                   | 0.3237  |
|               | No steam-Hot air drying vs. Steam-Microwave drying    | -2.051   |                                         |                   | 0.3465  |
|               | No steam-Freeze drying vs. No steam-Microwave drying  | -1.906   |                                         |                   | 0.4301  |
|               | No steam-Freeze drying vs. Steam-Sun drying           | -1.523   |                                         |                   | 0.6799  |
|               | No steam-Freeze drying vs. Steam-Hot air drying       | -0.7245  |                                         |                   | 0.9896  |
|               | No steam-Freeze drying vs. Steam-Freeze drying        | -0.4155  |                                         |                   | 0.9997  |
|               | No steam-Freeze drying vs. Steam-Microwave drying     | -0.3722  |                                         |                   | 0.9998  |
|               | No steam-Microwave drying vs. Steam-Sun drying        | 0.3828   |                                         |                   | 0.9998  |
|               | No steam-Microwave drying vs. Steam-Hot air drying    | 1.181    |                                         |                   | 0.8749  |
|               | No steam-Microwave drying vs. Steam-Freeze drying     | 1.490    |                                         |                   | 0.7012  |
|               | No steam-Microwave drying vs. Steam-Microwave drying  | 1.534    |                                         |                   | 0.6729  |
|               | Steam-Sun drying vs. Steam-Hot air drying             | 0.7985   |                                         |                   | 0.9820  |
|               | Steam-Sun drying vs. Steam-Freeze drying              | 1.107    |                                         |                   | 0.9057  |
|               | Steam-Sun drying vs. Steam-Microwave drying           | 1.151    |                                         |                   | 0.8882  |
| <i>Uracil</i> |                                                       |          | One-Way ANOVA<br>Tukey's post hoc tests | F (7, 16) = 4.272 |         |

|                                        |                                                       |         |                                         |                   |         |
|----------------------------------------|-------------------------------------------------------|---------|-----------------------------------------|-------------------|---------|
|                                        | Steam-Hot air drying vs. Steam-Freeze drying          | 0.3090  |                                         |                   | >0.9999 |
|                                        | Steam-Hot air drying vs. Steam-Microwave drying       | 0.3523  |                                         |                   | 0.9999  |
|                                        | Steam-Freeze drying vs. Steam-Microwave drying        | 0.04330 |                                         |                   | >0.9999 |
| <i>Parishin E</i>                      | No steam-Sun drying vs. No steam-Hot air drying       | -0.3342 | One-Way ANOVA<br>Tukey's post hoc tests | F (7, 16) = 37.07 | >0.9999 |
|                                        | No steam-Sun drying vs. No steam-Freeze drying        | -11.23  |                                         |                   | 0.0064  |
|                                        | No steam-Sun drying vs. No steam-Microwave drying     | -16.44  |                                         |                   | 0.0001  |
|                                        | No steam-Sun drying vs. Steam-Sun drying              | -21.10  |                                         |                   | <0.0001 |
|                                        | No steam-Sun drying vs. Steam-Hot air drying          | -27.30  |                                         |                   | <0.0001 |
|                                        | No steam-Sun drying vs. Steam-Freeze drying           | -20.06  |                                         |                   | <0.0001 |
|                                        | No steam-Sun drying vs. Steam-Microwave drying        | -26.43  |                                         |                   | <0.0001 |
|                                        | No steam-Hot air drying vs. No steam-Freeze drying    | -10.90  |                                         |                   | 0.0084  |
|                                        | No steam-Hot air drying vs. No steam-Microwave drying | -16.10  |                                         |                   | 0.0002  |
|                                        | No steam-Hot air drying vs. Steam-Sun drying          | -20.77  |                                         |                   | <0.0001 |
|                                        | No steam-Hot air drying vs. Steam-Hot air drying      | -26.97  |                                         |                   | <0.0001 |
|                                        | No steam-Hot air drying vs. Steam-Freeze drying       | -19.73  |                                         |                   | <0.0001 |
|                                        | No steam-Hot air drying vs. Steam-Microwave drying    | -26.09  |                                         |                   | <0.0001 |
|                                        | No steam-Freeze drying vs. No steam-Microwave drying  | -5.204  |                                         |                   | 0.4565  |
|                                        | No steam-Freeze drying vs. Steam-Sun drying           | -9.867  |                                         |                   | 0.0188  |
|                                        | No steam-Freeze drying vs. Steam-Hot air drying       | -16.07  |                                         |                   | 0.0002  |
|                                        | No steam-Freeze drying vs. Steam-Freeze drying        | -8.827  |                                         |                   | 0.0420  |
|                                        | No steam-Freeze drying vs. Steam-Microwave drying     | -15.19  |                                         |                   | 0.0003  |
|                                        | No steam-Microwave drying vs. Steam-Sun drying        | -4.663  |                                         |                   | 0.5825  |
|                                        | No steam-Microwave drying vs. Steam-Hot air drying    | -10.86  |                                         |                   | 0.0086  |
|                                        | No steam-Microwave drying vs. Steam-Freeze drying     | -3.624  |                                         |                   | 0.8171  |
|                                        | No steam-Microwave drying vs. Steam-Microwave drying  | -9.990  |                                         |                   | 0.0171  |
|                                        | Steam-Sun drying vs. Steam-Hot air drying             | -6.198  |                                         |                   | 0.2639  |
|                                        | Steam-Sun drying vs. Steam-Freeze drying              | 1.039   |                                         |                   | 0.9998  |
|                                        | Steam-Sun drying vs. Steam-Microwave drying           | -5.327  |                                         |                   | 0.4293  |
|                                        | Steam-Hot air drying vs. Steam-Freeze drying          | 7.238   |                                         |                   | 0.1341  |
|                                        | Steam-Hot air drying vs. Steam-Microwave drying       | 0.8713  |                                         |                   | >0.9999 |
|                                        | Steam-Freeze drying vs. Steam-Microwave drying        | -6.366  |                                         |                   | 0.2380  |
| <i>S-(4-hydroxybenzyl)-glutathione</i> | No steam-Sun drying vs. No steam-Hot air drying       | 0.2379  | One-Way ANOVA<br>Tukey's post hoc tests | F (7, 16) = 169.0 | >0.9999 |
|                                        | No steam-Sun drying vs. No steam-Freeze drying        | 1.284   |                                         |                   | 0.8273  |
|                                        | No steam-Sun drying vs. No steam-Microwave drying     | -14.91  |                                         |                   | <0.0001 |
|                                        | No steam-Sun drying vs. Steam-Sun drying              | -11.77  |                                         |                   | <0.0001 |
|                                        | No steam-Sun drying vs. Steam-Hot air drying          | 0.4463  |                                         |                   | 0.9995  |
|                                        | No steam-Sun drying vs. Steam-Freeze drying           | -14.96  |                                         |                   | <0.0001 |
|                                        | No steam-Sun drying vs. Steam-Microwave drying        | -16.89  |                                         |                   | <0.0001 |
|                                        | No steam-Hot air drying vs. No steam-Freeze drying    | 1.046   |                                         |                   | 0.9290  |
|                                        | No steam-Hot air drying vs. No steam-Microwave drying | -15.15  |                                         |                   | <0.0001 |
|                                        | No steam-Hot air drying vs. Steam-Sun drying          | -12.01  |                                         |                   | <0.0001 |
|                                        | No steam-Hot air drying vs. Steam-Hot air drying      | 0.2084  |                                         |                   | >0.9999 |
|                                        | No steam-Hot air drying vs. Steam-Freeze drying       | -15.20  |                                         |                   | <0.0001 |
|                                        | No steam-Hot air drying vs. Steam-Microwave drying    | -17.13  |                                         |                   | <0.0001 |
|                                        | No steam-Freeze drying vs. No steam-Microwave drying  | -16.20  |                                         |                   | <0.0001 |
|                                        | No steam-Freeze drying vs. Steam-Sun drying           | -13.05  |                                         |                   | <0.0001 |
|                                        | No steam-Freeze drying vs. Steam-Hot air drying       | -0.8381 |                                         |                   | 0.9771  |
|                                        | No steam-Freeze drying vs. Steam-Freeze drying        | -16.25  |                                         |                   | <0.0001 |

|                                                       |                                                       |          |                                         |                   |         |
|-------------------------------------------------------|-------------------------------------------------------|----------|-----------------------------------------|-------------------|---------|
|                                                       | No steam-Freeze drying vs. Steam-Microwave drying     | -18.17   |                                         |                   | <0.0001 |
|                                                       | No steam-Microwave drying vs. Steam-Sun drying        | 3.141    |                                         |                   | 0.0451  |
|                                                       | No steam-Microwave drying vs. Steam-Hot air drying    | 15.36    |                                         |                   | <0.0001 |
|                                                       | No steam-Microwave drying vs. Steam-Freeze drying     | -0.05196 |                                         |                   | >0.9999 |
|                                                       | No steam-Microwave drying vs. Steam-Microwave drying  | -1.977   |                                         |                   | 0.3932  |
|                                                       | Steam-Sun drying vs. Steam-Hot air drying             | 12.22    |                                         |                   | <0.0001 |
|                                                       | Steam-Sun drying vs. Steam-Freeze drying              | -3.193   |                                         |                   | 0.0404  |
|                                                       | Steam-Sun drying vs. Steam-Microwave drying           | -5.119   |                                         |                   | 0.0006  |
|                                                       | Steam-Hot air drying vs. Steam-Freeze drying          | -15.41   |                                         |                   | <0.0001 |
|                                                       | Steam-Hot air drying vs. Steam-Microwave drying       | -17.33   |                                         |                   | <0.0001 |
|                                                       | Steam-Freeze drying vs. Steam-Microwave drying        | -1.925   |                                         |                   | 0.4238  |
| <i>Parishin B</i>                                     | No steam-Sun drying vs. No steam-Hot air drying       | 3.353    | One-Way ANOVA<br>Tukey's post hoc tests | F (7, 16) = 65.89 | 0.8852  |
|                                                       | No steam-Sun drying vs. No steam-Freeze drying        | -4.807   |                                         |                   | 0.5889  |
|                                                       | No steam-Sun drying vs. No steam-Microwave drying     | -27.74   |                                         |                   | <0.0001 |
|                                                       | No steam-Sun drying vs. Steam-Sun drying              | -28.74   |                                         |                   | <0.0001 |
|                                                       | No steam-Sun drying vs. Steam-Hot air drying          | -27.72   |                                         |                   | <0.0001 |
|                                                       | No steam-Sun drying vs. Steam-Freeze drying           | -28.20   |                                         |                   | <0.0001 |
|                                                       | No steam-Sun drying vs. Steam-Microwave drying        | -30.89   |                                         |                   | <0.0001 |
|                                                       | No steam-Hot air drying vs. No steam-Freeze drying    | -8.161   |                                         |                   | 0.0856  |
|                                                       | No steam-Hot air drying vs. No steam-Microwave drying | -31.10   |                                         |                   | <0.0001 |
|                                                       | No steam-Hot air drying vs. Steam-Sun drying          | -32.09   |                                         |                   | <0.0001 |
|                                                       | No steam-Hot air drying vs. Steam-Hot air drying      | -31.07   |                                         |                   | <0.0001 |
|                                                       | No steam-Hot air drying vs. Steam-Freeze drying       | -31.55   |                                         |                   | <0.0001 |
|                                                       | No steam-Hot air drying vs. Steam-Microwave drying    | -34.24   |                                         |                   | <0.0001 |
|                                                       | No steam-Freeze drying vs. No steam-Microwave drying  | -22.94   |                                         |                   | <0.0001 |
|                                                       | No steam-Freeze drying vs. Steam-Sun drying           | -23.93   |                                         |                   | <0.0001 |
|                                                       | No steam-Freeze drying vs. Steam-Hot air drying       | -22.91   |                                         |                   | <0.0001 |
|                                                       | No steam-Freeze drying vs. Steam-Freeze drying        | -23.39   |                                         |                   | <0.0001 |
|                                                       | No steam-Freeze drying vs. Steam-Microwave drying     | -26.08   |                                         |                   | <0.0001 |
|                                                       | No steam-Microwave drying vs. Steam-Sun drying        | -0.9928  |                                         |                   | >0.9999 |
|                                                       | No steam-Microwave drying vs. Steam-Hot air drying    | 0.02570  |                                         |                   | >0.9999 |
|                                                       | No steam-Microwave drying vs. Steam-Freeze drying     | -0.4561  |                                         |                   | >0.9999 |
|                                                       | No steam-Microwave drying vs. Steam-Microwave drying  | -3.142   |                                         |                   | 0.9141  |
|                                                       | Steam-Sun drying vs. Steam-Hot air drying             | 1.019    |                                         |                   | 0.9999  |
|                                                       | Steam-Sun drying vs. Steam-Freeze drying              | 0.5368   |                                         |                   | >0.9999 |
| Steam-Sun drying vs. Steam-Microwave drying           | -2.150                                                | 0.9880   |                                         |                   |         |
| Steam-Hot air drying vs. Steam-Freeze drying          | -0.4818                                               | >0.9999  |                                         |                   |         |
| Steam-Hot air drying vs. Steam-Microwave drying       | -3.168                                                | 0.9108   |                                         |                   |         |
| Steam-Freeze drying vs. Steam-Microwave drying        | -2.686                                                | 0.9599   |                                         |                   |         |
| <i>Parishin C</i>                                     | No steam-Sun drying vs. No steam-Hot air drying       | 0.1356   | One-Way ANOVA<br>Tukey's post hoc tests | F (7, 16) = 62.40 | >0.9999 |
|                                                       | No steam-Sun drying vs. No steam-Freeze drying        | -1.244   |                                         |                   | 0.8807  |
|                                                       | No steam-Sun drying vs. No steam-Microwave drying     | -9.426   |                                         |                   | <0.0001 |
|                                                       | No steam-Sun drying vs. Steam-Sun drying              | -9.154   |                                         |                   | <0.0001 |
|                                                       | No steam-Sun drying vs. Steam-Hot air drying          | -9.617   |                                         |                   | <0.0001 |
|                                                       | No steam-Sun drying vs. Steam-Freeze drying           | -9.952   |                                         |                   | <0.0001 |
|                                                       | No steam-Sun drying vs. Steam-Microwave drying        | -13.16   |                                         |                   | <0.0001 |
|                                                       | No steam-Hot air drying vs. No steam-Freeze drying    | -1.379   |                                         |                   | 0.8180  |
| No steam-Hot air drying vs. No steam-Microwave drying | -9.562                                                | <0.0001  |                                         |                   |         |

|                   |                                                       |         |                                         |                   |         |
|-------------------|-------------------------------------------------------|---------|-----------------------------------------|-------------------|---------|
|                   | No steam-Hot air drying vs. Steam-Sun drying          | -9.290  |                                         |                   | <0.0001 |
|                   | No steam-Hot air drying vs. Steam-Hot air drying      | -9.753  |                                         |                   | <0.0001 |
|                   | No steam-Hot air drying vs. Steam-Freeze drying       | -10.09  |                                         |                   | <0.0001 |
|                   | No steam-Hot air drying vs. Steam-Microwave drying    | -13.30  |                                         |                   | <0.0001 |
|                   | No steam-Freeze drying vs. No steam-Microwave drying  | -8.183  |                                         |                   | <0.0001 |
|                   | No steam-Freeze drying vs. Steam-Sun drying           | -7.911  |                                         |                   | <0.0001 |
|                   | No steam-Freeze drying vs. Steam-Hot air drying       | -8.373  |                                         |                   | <0.0001 |
|                   | No steam-Freeze drying vs. Steam-Freeze drying        | -8.708  |                                         |                   | <0.0001 |
|                   | No steam-Freeze drying vs. Steam-Microwave drying     | -11.92  |                                         |                   | <0.0001 |
|                   | No steam-Microwave drying vs. Steam-Sun drying        | 0.2719  |                                         |                   | >0.9999 |
|                   | No steam-Microwave drying vs. Steam-Hot air drying    | -0.1908 |                                         |                   | >0.9999 |
|                   | No steam-Microwave drying vs. Steam-Freeze drying     | -0.5256 |                                         |                   | 0.9990  |
|                   | No steam-Microwave drying vs. Steam-Microwave drying  | -3.737  |                                         |                   | 0.0197  |
|                   | Steam-Sun drying vs. Steam-Hot air drying             | -0.4627 |                                         |                   | 0.9996  |
|                   | Steam-Sun drying vs. Steam-Freeze drying              | -0.7974 |                                         |                   | 0.9874  |
|                   | Steam-Sun drying vs. Steam-Microwave drying           | -4.009  |                                         |                   | 0.0113  |
|                   | Steam-Hot air drying vs. Steam-Freeze drying          | -0.3348 |                                         |                   | >0.9999 |
|                   | Steam-Hot air drying vs. Steam-Microwave drying       | -3.547  |                                         |                   | 0.0291  |
|                   | Steam-Freeze drying vs. Steam-Microwave drying        | -3.212  |                                         |                   | 0.0567  |
|                   | No steam-Sun drying vs. No steam-Hot air drying       | 10.76   |                                         |                   | 0.0232  |
|                   | No steam-Sun drying vs. No steam-Freeze drying        | -7.732  |                                         |                   | 0.1694  |
|                   | No steam-Sun drying vs. No steam-Microwave drying     | -33.46  |                                         |                   | <0.0001 |
|                   | No steam-Sun drying vs. Steam-Sun drying              | -37.77  |                                         |                   | <0.0001 |
|                   | No steam-Sun drying vs. Steam-Hot air drying          | -37.09  |                                         |                   | <0.0001 |
|                   | No steam-Sun drying vs. Steam-Freeze drying           | -41.98  |                                         |                   | <0.0001 |
|                   | No steam-Sun drying vs. Steam-Microwave drying        | -39.73  |                                         |                   | <0.0001 |
|                   | No steam-Hot air drying vs. No steam-Freeze drying    | -18.50  |                                         |                   | 0.0001  |
|                   | No steam-Hot air drying vs. No steam-Microwave drying | -44.22  |                                         |                   | <0.0001 |
|                   | No steam-Hot air drying vs. Steam-Sun drying          | -48.54  |                                         |                   | <0.0001 |
|                   | No steam-Hot air drying vs. Steam-Hot air drying      | -47.85  |                                         |                   | <0.0001 |
|                   | No steam-Hot air drying vs. Steam-Freeze drying       | -52.74  |                                         |                   | <0.0001 |
|                   | No steam-Hot air drying vs. Steam-Microwave drying    | -50.50  |                                         |                   | <0.0001 |
|                   | No steam-Freeze drying vs. No steam-Microwave drying  | -25.72  |                                         |                   | <0.0001 |
|                   | No steam-Freeze drying vs. Steam-Sun drying           | -30.04  |                                         |                   | <0.0001 |
|                   | No steam-Freeze drying vs. Steam-Hot air drying       | -29.36  |                                         |                   | <0.0001 |
|                   | No steam-Freeze drying vs. Steam-Freeze drying        | -34.25  |                                         |                   | <0.0001 |
|                   | No steam-Freeze drying vs. Steam-Microwave drying     | -32.00  |                                         |                   | <0.0001 |
|                   | No steam-Microwave drying vs. Steam-Sun drying        | -4.317  |                                         |                   | 0.7711  |
|                   | No steam-Microwave drying vs. Steam-Hot air drying    | -3.632  |                                         |                   | 0.8846  |
|                   | No steam-Microwave drying vs. Steam-Freeze drying     | -8.524  |                                         |                   | 0.1040  |
|                   | No steam-Microwave drying vs. Steam-Microwave drying  | -6.279  |                                         |                   | 0.3725  |
|                   | Steam-Sun drying vs. Steam-Hot air drying             | 0.6850  |                                         |                   | >0.9999 |
|                   | Steam-Sun drying vs. Steam-Freeze drying              | -4.207  |                                         |                   | 0.7917  |
|                   | Steam-Sun drying vs. Steam-Microwave drying           | -1.961  |                                         |                   | 0.9956  |
|                   | Steam-Hot air drying vs. Steam-Freeze drying          | -4.892  |                                         |                   | 0.6545  |
|                   | Steam-Hot air drying vs. Steam-Microwave drying       | -2.646  |                                         |                   | 0.9755  |
|                   | Steam-Freeze drying vs. Steam-Microwave drying        | 2.245   |                                         |                   | 0.9902  |
| <i>Parishin A</i> | No steam-Sun drying vs. No steam-Hot air drying       | 0.05678 | One-Way ANOVA<br>Tukey's post hoc tests | F (7, 16) = 113.0 | >0.9999 |
| <i>Parishin D</i> | No steam-Sun drying vs. No steam-Hot air drying       | 0.05678 | One-Way ANOVA                           | F (7, 16) = 35.79 | >0.9999 |

|                                                   |                                                       |          |                                         |                   |         |
|---------------------------------------------------|-------------------------------------------------------|----------|-----------------------------------------|-------------------|---------|
|                                                   | No steam-Sun drying vs. No steam-Freeze drying        | -7.809   | Tukey's post hoc tests                  |                   | <0.0001 |
|                                                   | No steam-Sun drying vs. No steam-Microwave drying     | -0.5255  |                                         |                   | 0.9865  |
|                                                   | No steam-Sun drying vs. Steam-Sun drying              | -0.7378  |                                         |                   | 0.9212  |
|                                                   | No steam-Sun drying vs. Steam-Hot air drying          | -0.7047  |                                         |                   | 0.9366  |
|                                                   | No steam-Sun drying vs. Steam-Freeze drying           | -0.8756  |                                         |                   | 0.8350  |
|                                                   | No steam-Sun drying vs. Steam-Microwave drying        | -0.7643  |                                         |                   | 0.9074  |
|                                                   | No steam-Hot air drying vs. No steam-Freeze drying    | -7.866   |                                         |                   | <0.0001 |
|                                                   | No steam-Hot air drying vs. No steam-Microwave drying | -0.5823  |                                         |                   | 0.9761  |
|                                                   | No steam-Hot air drying vs. Steam-Sun drying          | -0.7946  |                                         |                   | 0.8899  |
|                                                   | No steam-Hot air drying vs. Steam-Hot air drying      | -0.7615  |                                         |                   | 0.9089  |
|                                                   | No steam-Hot air drying vs. Steam-Freeze drying       | -0.9323  |                                         |                   | 0.7901  |
|                                                   | No steam-Hot air drying vs. Steam-Microwave drying    | -0.8210  |                                         |                   | 0.8732  |
|                                                   | No steam-Freeze drying vs. No steam-Microwave drying  | 7.284    |                                         |                   | <0.0001 |
|                                                   | No steam-Freeze drying vs. Steam-Sun drying           | 7.071    |                                         |                   | <0.0001 |
|                                                   | No steam-Freeze drying vs. Steam-Hot air drying       | 7.104    |                                         |                   | <0.0001 |
|                                                   | No steam-Freeze drying vs. Steam-Freeze drying        | 6.934    |                                         |                   | <0.0001 |
|                                                   | No steam-Freeze drying vs. Steam-Microwave drying     | 7.045    |                                         |                   | <0.0001 |
|                                                   | No steam-Microwave drying vs. Steam-Sun drying        | -0.2123  |                                         |                   | >0.9999 |
|                                                   | No steam-Microwave drying vs. Steam-Hot air drying    | -0.1791  |                                         |                   | >0.9999 |
|                                                   | No steam-Microwave drying vs. Steam-Freeze drying     | -0.3500  |                                         |                   | 0.9988  |
|                                                   | No steam-Microwave drying vs. Steam-Microwave drying  | -0.2387  |                                         |                   | >0.9999 |
|                                                   | Steam-Sun drying vs. Steam-Hot air drying             | 0.03313  |                                         |                   | >0.9999 |
|                                                   | Steam-Sun drying vs. Steam-Freeze drying              | -0.1378  |                                         |                   | >0.9999 |
|                                                   | Steam-Sun drying vs. Steam-Microwave drying           | -0.02646 |                                         |                   | >0.9999 |
|                                                   | Steam-Hot air drying vs. Steam-Freeze drying          | -0.1709  |                                         |                   | >0.9999 |
|                                                   | Steam-Hot air drying vs. Steam-Microwave drying       | -0.05959 |                                         |                   | >0.9999 |
|                                                   | Steam-Freeze drying vs. Steam-Microwave drying        | 0.1113   |                                         |                   | >0.9999 |
| Parishin L                                        | No steam-Sun drying vs. No steam-Hot air drying       | 0.4984   | One-Way ANOVA<br>Tukey's post hoc tests | F (7, 16) = 17.71 | 0.9805  |
|                                                   | No steam-Sun drying vs. No steam-Freeze drying        | -0.7093  |                                         |                   | 0.8876  |
|                                                   | No steam-Sun drying vs. No steam-Microwave drying     | -2.004   |                                         |                   | 0.0343  |
|                                                   | No steam-Sun drying vs. Steam-Sun drying              | -2.216   |                                         |                   | 0.0163  |
|                                                   | No steam-Sun drying vs. Steam-Hot air drying          | -1.851   |                                         |                   | 0.0581  |
|                                                   | No steam-Sun drying vs. Steam-Freeze drying           | -4.563   |                                         |                   | <0.0001 |
|                                                   | No steam-Sun drying vs. Steam-Microwave drying        | -2.833   |                                         |                   | 0.0018  |
|                                                   | No steam-Hot air drying vs. No steam-Freeze drying    | -1.208   |                                         |                   | 0.3967  |
|                                                   | No steam-Hot air drying vs. No steam-Microwave drying | -2.502   |                                         |                   | 0.0059  |
|                                                   | No steam-Hot air drying vs. Steam-Sun drying          | -2.714   |                                         |                   | 0.0028  |
|                                                   | No steam-Hot air drying vs. Steam-Hot air drying      | -2.349   |                                         |                   | 0.0101  |
|                                                   | No steam-Hot air drying vs. Steam-Freeze drying       | -5.062   |                                         |                   | <0.0001 |
|                                                   | No steam-Hot air drying vs. Steam-Microwave drying    | -3.332   |                                         |                   | 0.0003  |
|                                                   | No steam-Freeze drying vs. No steam-Microwave drying  | -1.294   |                                         |                   | 0.3196  |
|                                                   | No steam-Freeze drying vs. Steam-Sun drying           | -1.506   |                                         |                   | 0.1761  |
|                                                   | No steam-Freeze drying vs. Steam-Hot air drying       | -1.141   |                                         |                   | 0.4619  |
|                                                   | No steam-Freeze drying vs. Steam-Freeze drying        | -3.854   |                                         |                   | <0.0001 |
|                                                   | No steam-Freeze drying vs. Steam-Microwave drying     | -2.124   |                                         |                   | 0.0225  |
|                                                   | No steam-Microwave drying vs. Steam-Sun drying        | -0.2120  |                                         |                   | >0.9999 |
|                                                   | No steam-Microwave drying vs. Steam-Hot air drying    | 0.1529   |                                         |                   | >0.9999 |
| No steam-Microwave drying vs. Steam-Freeze drying | -2.560                                                | 0.0048   |                                         |                   |         |

|                   |                                                       |         |                                         |                   |         |
|-------------------|-------------------------------------------------------|---------|-----------------------------------------|-------------------|---------|
|                   | No steam-Microwave drying vs. Steam-Microwave drying  | -0.8297 |                                         |                   | 0.7888  |
|                   | Steam-Sun drying vs. Steam-Hot air drying             | 0.3649  |                                         |                   | 0.9969  |
|                   | Steam-Sun drying vs. Steam-Freeze drying              | -2.348  |                                         |                   | 0.0102  |
|                   | Steam-Sun drying vs. Steam-Microwave drying           | -0.6177 |                                         |                   | 0.9406  |
|                   | Steam-Hot air drying vs. Steam-Freeze drying          | -2.712  |                                         |                   | 0.0028  |
|                   | Steam-Hot air drying vs. Steam-Microwave drying       | -0.9826 |                                         |                   | 0.6315  |
|                   | Steam-Freeze drying vs. Steam-Microwave drying        | 1.730   |                                         |                   | 0.0870  |
| <i>Parishin R</i> | No steam-Sun drying vs. No steam-Hot air drying       | 0.6401  | One-Way ANOVA<br>Tukey's post hoc tests | F (7, 16) = 7.304 | 0.9566  |
|                   | No steam-Sun drying vs. No steam-Freeze drying        | -0.2909 |                                         |                   | 0.9996  |
|                   | No steam-Sun drying vs. No steam-Microwave drying     | 0.1418  |                                         |                   | >0.9999 |
|                   | No steam-Sun drying vs. Steam-Sun drying              | -2.178  |                                         |                   | 0.0382  |
|                   | No steam-Sun drying vs. Steam-Hot air drying          | -1.653  |                                         |                   | 0.1806  |
|                   | No steam-Sun drying vs. Steam-Freeze drying           | -2.108  |                                         |                   | 0.0475  |
|                   | No steam-Sun drying vs. Steam-Microwave drying        | -1.916  |                                         |                   | 0.0852  |
|                   | No steam-Hot air drying vs. No steam-Freeze drying    | -0.9310 |                                         |                   | 0.7756  |
|                   | No steam-Hot air drying vs. No steam-Microwave drying | -0.4983 |                                         |                   | 0.9888  |
|                   | No steam-Hot air drying vs. Steam-Sun drying          | -2.818  |                                         |                   | 0.0049  |
|                   | No steam-Hot air drying vs. Steam-Hot air drying      | -2.293  |                                         |                   | 0.0265  |
|                   | No steam-Hot air drying vs. Steam-Freeze drying       | -2.748  |                                         |                   | 0.0061  |
|                   | No steam-Hot air drying vs. Steam-Microwave drying    | -2.556  |                                         |                   | 0.0114  |
|                   | No steam-Freeze drying vs. No steam-Microwave drying  | 0.4327  |                                         |                   | 0.9951  |
|                   | No steam-Freeze drying vs. Steam-Sun drying           | -1.887  |                                         |                   | 0.0930  |
|                   | No steam-Freeze drying vs. Steam-Hot air drying       | -1.362  |                                         |                   | 0.3721  |
|                   | No steam-Freeze drying vs. Steam-Freeze drying        | -1.817  |                                         |                   | 0.1141  |
|                   | No steam-Freeze drying vs. Steam-Microwave drying     | -1.625  |                                         |                   | 0.1947  |
|                   | No steam-Microwave drying vs. Steam-Sun drying        | -2.319  |                                         |                   | 0.0244  |
|                   | No steam-Microwave drying vs. Steam-Hot air drying    | -1.795  |                                         |                   | 0.1215  |
|                   | No steam-Microwave drying vs. Steam-Freeze drying     | -2.250  |                                         |                   | 0.0304  |
|                   | No steam-Microwave drying vs. Steam-Microwave drying  | -2.058  |                                         |                   | 0.0554  |
|                   | Steam-Sun drying vs. Steam-Hot air drying             | 0.5246  |                                         |                   | 0.9850  |
|                   | Steam-Sun drying vs. Steam-Freeze drying              | 0.06985 |                                         |                   | >0.9999 |
|                   | Steam-Sun drying vs. Steam-Microwave drying           | 0.2615  |                                         |                   | 0.9998  |
|                   | Steam-Hot air drying vs. Steam-Freeze drying          | -0.4547 |                                         |                   | 0.9935  |
|                   | Steam-Hot air drying vs. Steam-Microwave drying       | -0.2631 |                                         |                   | 0.9998  |
|                   | Steam-Freeze drying vs. Steam-Microwave drying        | 0.1917  |                                         |                   | >0.9999 |
