# Supplementary material for: Identifying the quality markers and optimizing the processing of Gastrodiae rhizoma to treat brain diseases
Source: PubMed Central journal article supplement (PMC11576197; doi:10.3389/fphar.2024.1396825), 2024-11-06
Supplement: Table4.pdf [file Table4.pdf]

## Supplement Tables

**Table S4. Normality and Lognormality Tests and P value of figure 8**

| Marker                                 | Groups | P value | Passed normality test (alpha=0.05) | Choice of analytical method          |
|----------------------------------------|--------|---------|------------------------------------|--------------------------------------|
| <i>Gastrodin</i>                       | AKT1   | 0.0509  | Yes                                | One-Way ANOVA Tukey's post hoc tests |
|                                        | MAPK8  | 0.0513  | Yes                                |                                      |
|                                        | SRC    | 0.0585  | Yes                                |                                      |
|                                        | EGFR   | 0.1798  | Yes                                |                                      |
| <i>S-(4-hydroxybenzyl)-glutathione</i> | AKT1   | 0.8594  | Yes                                | One-Way ANOVA Tukey's post hoc tests |
|                                        | MAPK8  | 0.8746  | Yes                                |                                      |
|                                        | SRC    | 0.2747  | Yes                                |                                      |
|                                        | EGFR   | 0.3249  | Yes                                |                                      |
| <i>Parishin C</i>                      | AKT1   | 0.0657  | Yes                                | One-Way ANOVA Tukey's post hoc tests |
|                                        | MAPK8  | 0.0567  | Yes                                |                                      |
|                                        | SRC    | 0.0845  | Yes                                |                                      |
|                                        | EGFR   | 0.0501  | Yes                                |                                      |
| <i>Glucosyringic acid</i>              | AKT1   | 0.0635  | Yes                                | One-Way ANOVA Tukey's post hoc tests |
|                                        | MAPK8  | 0.0522  | Yes                                |                                      |
|                                        | SRC    | 0.6689  | Yes                                |                                      |
|                                        | EGFR   | 0.5817  | Yes                                |                                      |
