# Supplementary material for: Identifying the quality markers and optimizing the processing of Gastrodiae rhizoma to treat brain diseases
Source: PubMed Central journal article supplement (PMC11576197; doi:10.3389/fphar.2024.1396825), 2024-11-06
Supplement: Table5.pdf [file Table5.pdf]

## Supplement Tables

**Table S5. The F value and P value in multiple comparisons of figure 8**

| Marker                                 | Groups         | Mean Diff. | Type of ANOVA                           | 95.00% CI of diff.  | F, DF <sub>n</sub> , Dfd | P value |
|----------------------------------------|----------------|------------|-----------------------------------------|---------------------|--------------------------|---------|
| <i>Gastrodin</i>                       | AKT1 vs. MAPK8 | 1.915      | One-Way ANOVA<br>Tukey's post hoc tests | 1.493 to 2.337      | F (3, 76) = 52.24        | <0.0001 |
|                                        | AKT1 vs. SRC   | 1.475      |                                         | 1.053 to 1.897      |                          | <0.0001 |
|                                        | AKT1 vs. EGFR  | 1.000      |                                         | 0.5777 to 1.422     |                          | <0.0001 |
|                                        | MAPK8 vs. SRC  | -0.4400    |                                         | -0.8623 to -0.01774 |                          | 0.0379  |
|                                        | MAPK8 vs. EGFR | -0.9150    |                                         | -1.337 to -0.4927   |                          | <0.0001 |
|                                        | SRC vs. EGFR   | -0.4750    |                                         | -0.8973 to -0.05274 |                          | 0.0212  |
| <i>S-(4-hydroxybenzyl)-glutathione</i> | AKT1 vs. MAPK8 | 1.790      | One-Way ANOVA<br>Tukey's post hoc tests | 1.589 to 1.991      | F (3, 76) = 234.0        | <0.0001 |
|                                        | AKT1 vs. SRC   | 1.420      |                                         | 1.219 to 1.621      |                          | <0.0001 |
|                                        | AKT1 vs. EGFR  | 1.665      |                                         | 1.464 to 1.866      |                          | <0.0001 |
|                                        | MAPK8 vs. SRC  | -0.3700    |                                         | -0.5708 to -0.1692  |                          | <0.0001 |
|                                        | MAPK8 vs. EGFR | -0.1250    |                                         | -0.3258 to 0.07583  |                          | 0.3655  |
|                                        | SRC vs. EGFR   | 0.2450     |                                         | 0.04417 to 0.4458   |                          | 0.0104  |
| <i>Parishin C</i>                      | AKT1 vs. MAPK8 | 3.070      | One-Way ANOVA<br>Tukey's post hoc tests | 2.734 to 3.406      | F (3, 76) = 196.5        | <0.0001 |
|                                        | AKT1 vs. SRC   | 1.890      |                                         | 1.554 to 2.226      |                          | <0.0001 |
|                                        | AKT1 vs. EGFR  | 1.845      |                                         | 1.509 to 2.181      |                          | <0.0001 |
|                                        | MAPK8 vs. SRC  | -1.180     |                                         | -1.516 to -0.8440   |                          | <0.0001 |
|                                        | MAPK8 vs. EGFR | -1.225     |                                         | -1.561 to -0.8890   |                          | <0.0001 |
|                                        | SRC vs. EGFR   | -0.04500   |                                         | -0.3810 to 0.2910   |                          | 0.9850  |
| <i>Glucosyringic acid</i>              | AKT1 vs. MAPK8 | 0.9100     | One-Way ANOVA<br>Tukey's post hoc tests | 0.5108 to 1.309     | F (3, 76) = 19.39        | <0.0001 |
|                                        | AKT1 vs. SRC   | 0.5750     |                                         | 0.1758 to 0.9742    |                          | 0.0017  |
|                                        | AKT1 vs. EGFR  | -0.08000   |                                         | -0.4792 to 0.3192   |                          | 0.9524  |
|                                        | MAPK8 vs. SRC  | -0.3350    |                                         | -0.7342 to 0.06419  |                          | 0.1313  |
|                                        | MAPK8 vs. EGFR | -0.9900    |                                         | -1.389 to -0.5908   |                          | <0.0001 |
|                                        | SRC vs. EGFR   | -0.6550    |                                         | -1.054 to -0.2558   |                          | 0.0003  |
